# Supplementary material for: An efficient catalyst free synthesis of nitrogen containing spiro heterocycles via [5 + 1] double Michael addition reaction
Source: Royal Society of Chemistry journal article supplement (doi:10.1039/c4ra00521j), 2014-01-01

## Supporting Information

### An efficient catalyst free synthesis of nitrogen containing spiro heterocycles via [5 + 1] double Michael addition reaction

Komal Aggarwal<sup>a</sup>, Kanika Vij<sup>a</sup> and Jitender M. Khurana<sup>a\*</sup>

<sup>a</sup>Department of Chemistry, University of Delhi, Delhi-110007, India

\*Corresponding author. Tel.: +91 11 2766772; fax: +91 1 27667624

E-mail addresses: jmkhurana1@yahoo.co.in, jmkhurana@chemistry.du.ac.in

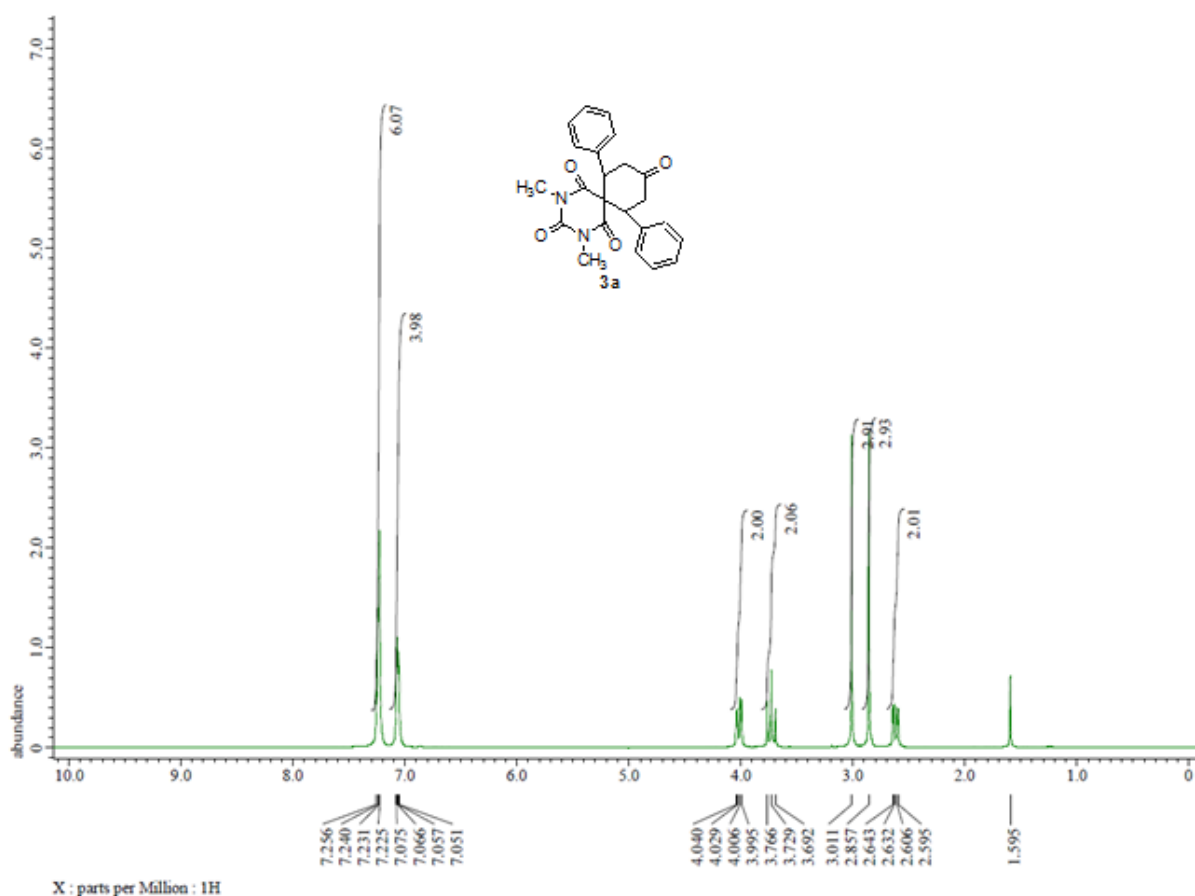

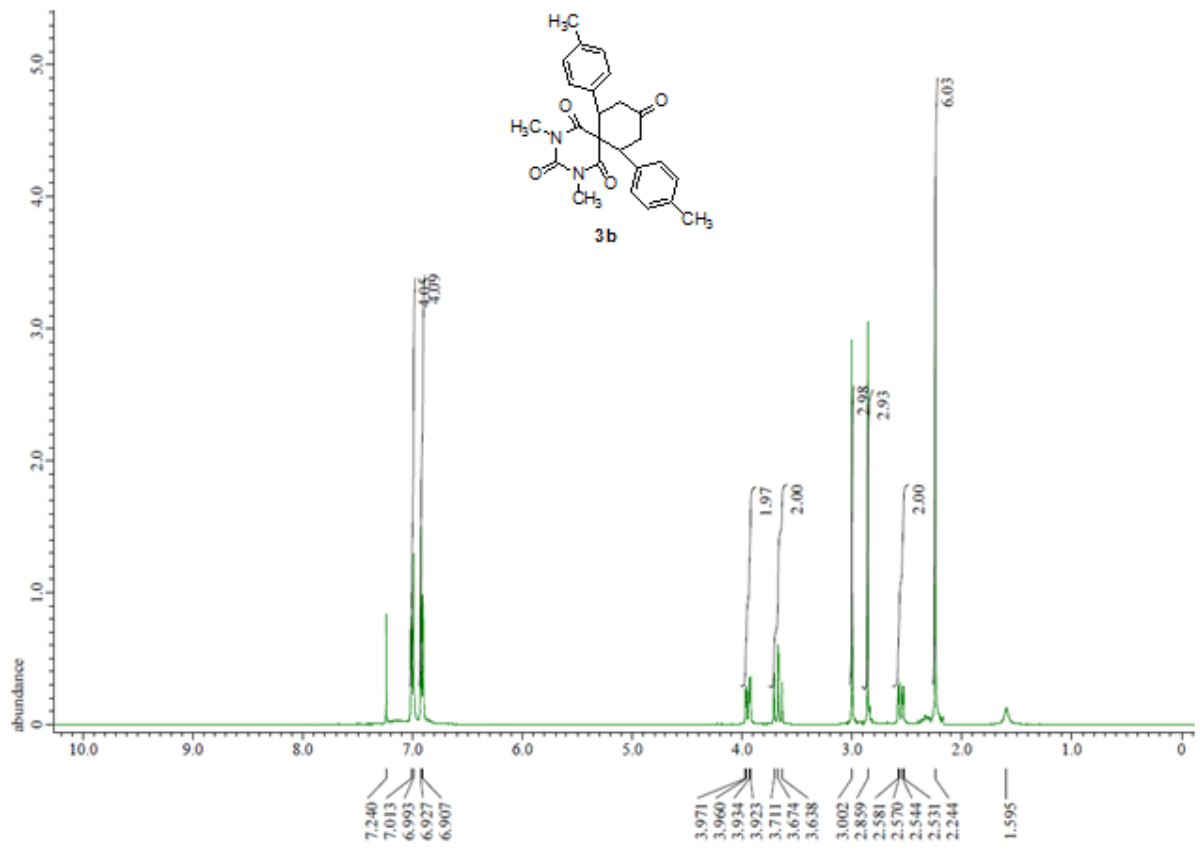

X : parts per Million : 1H

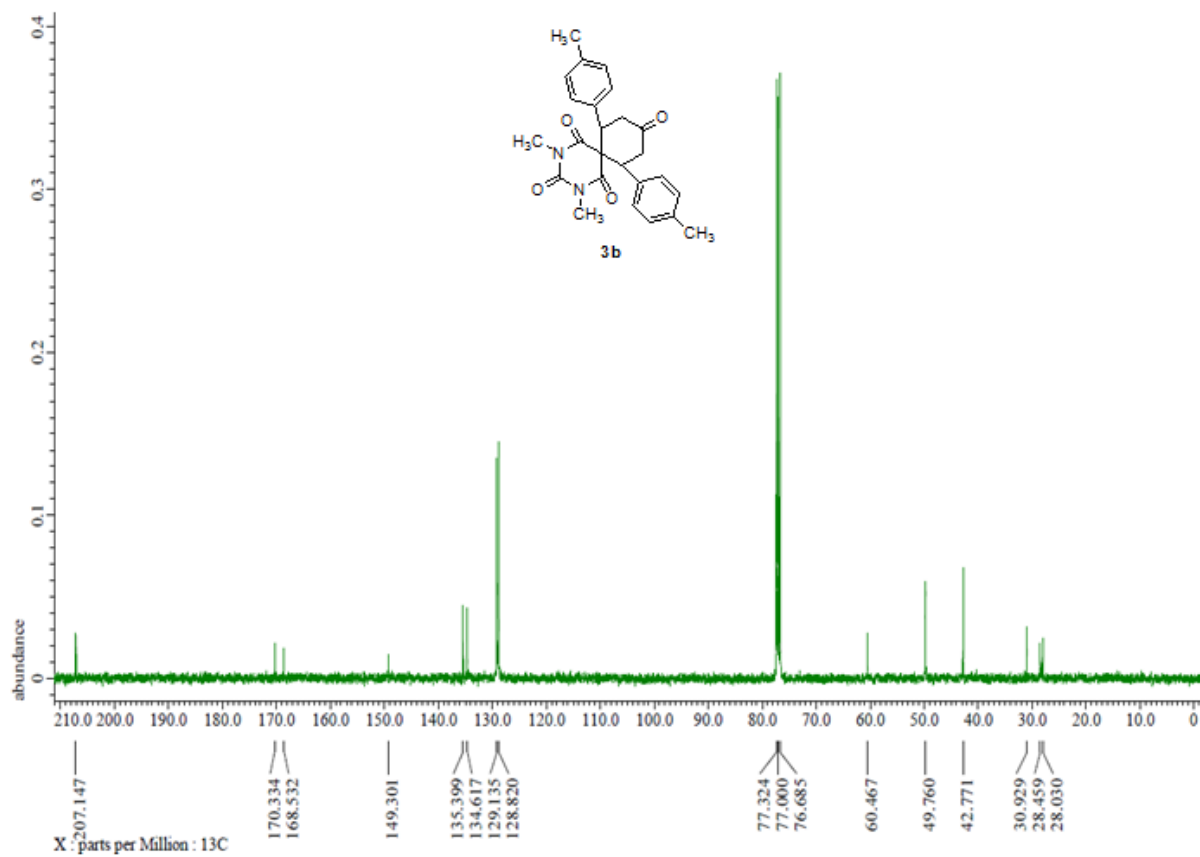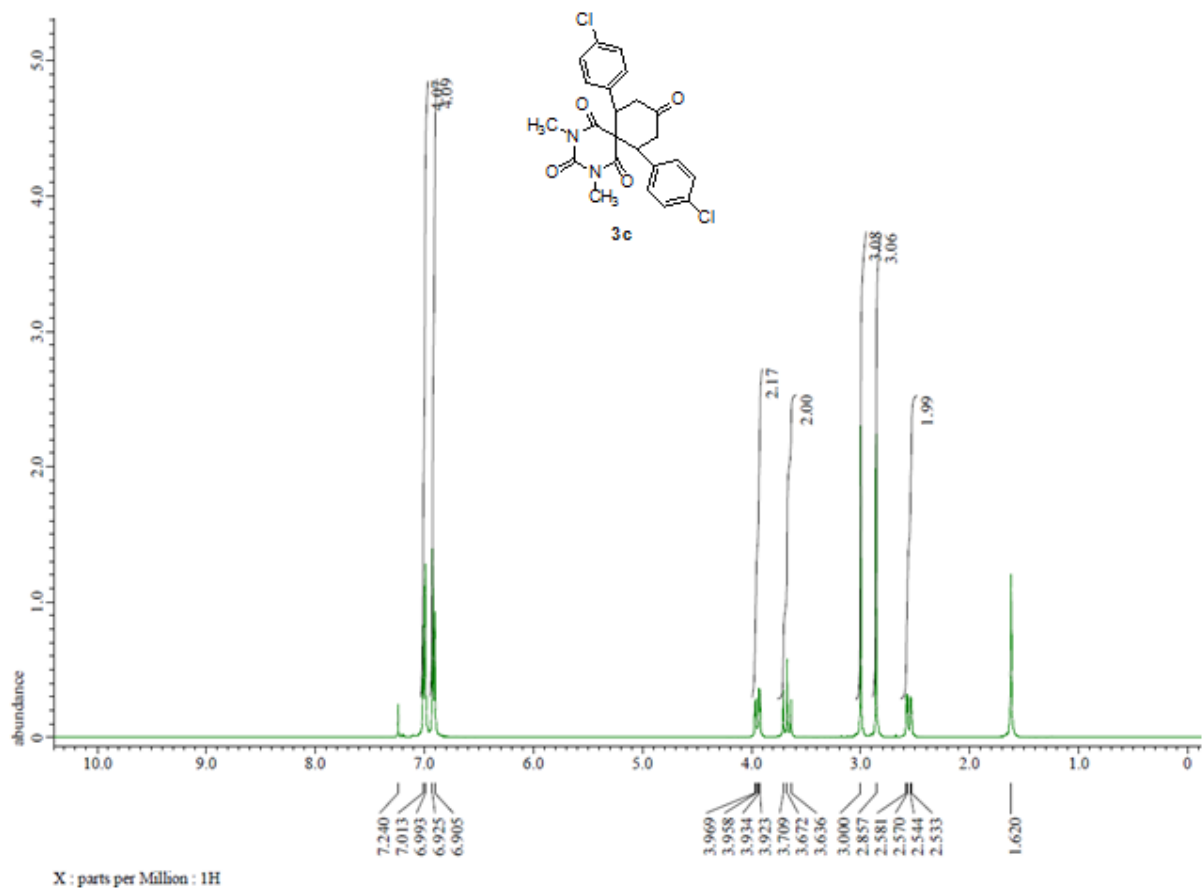

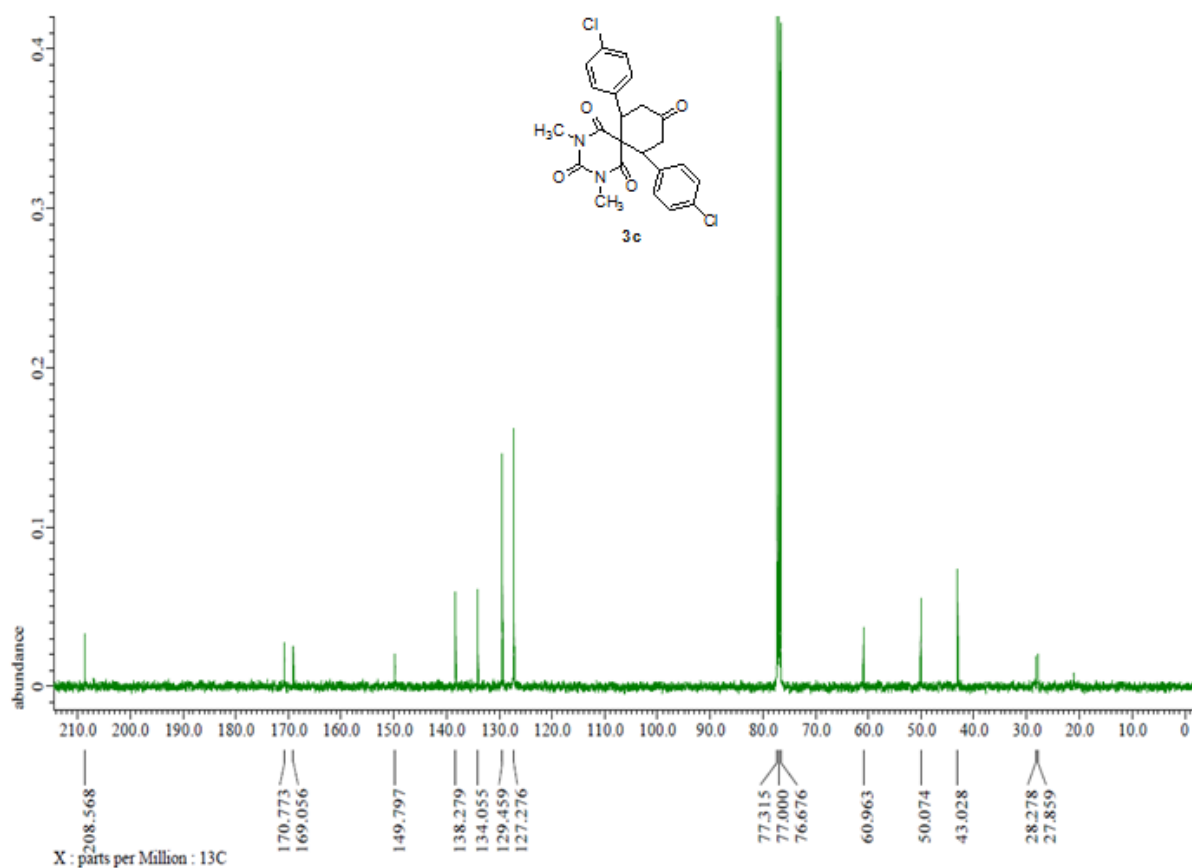

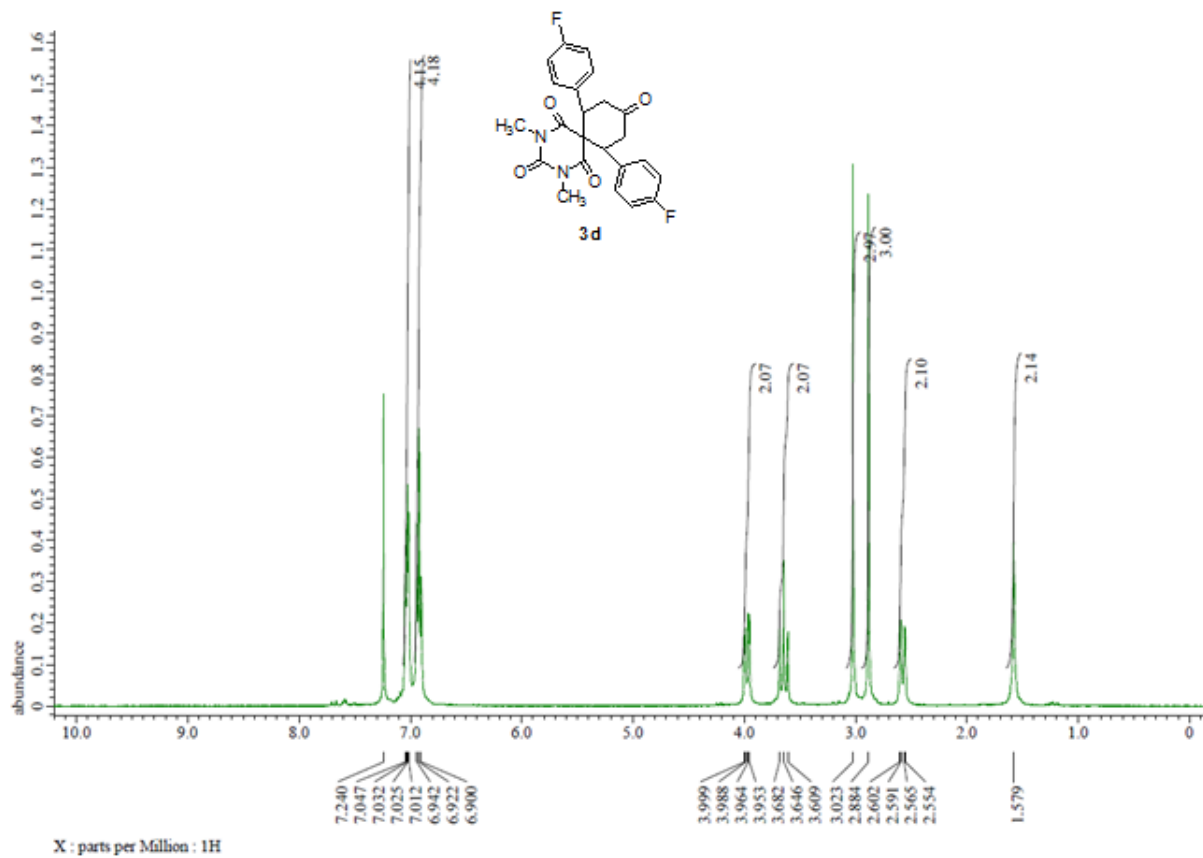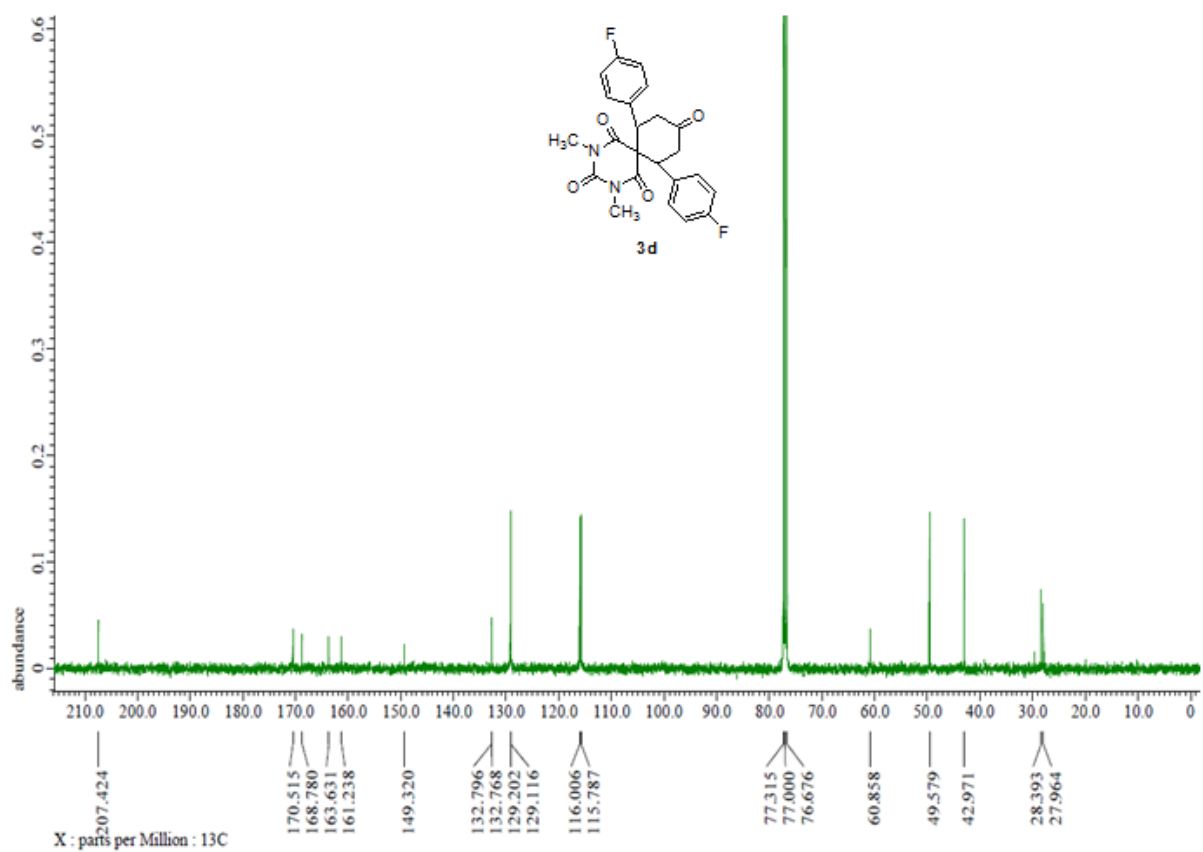

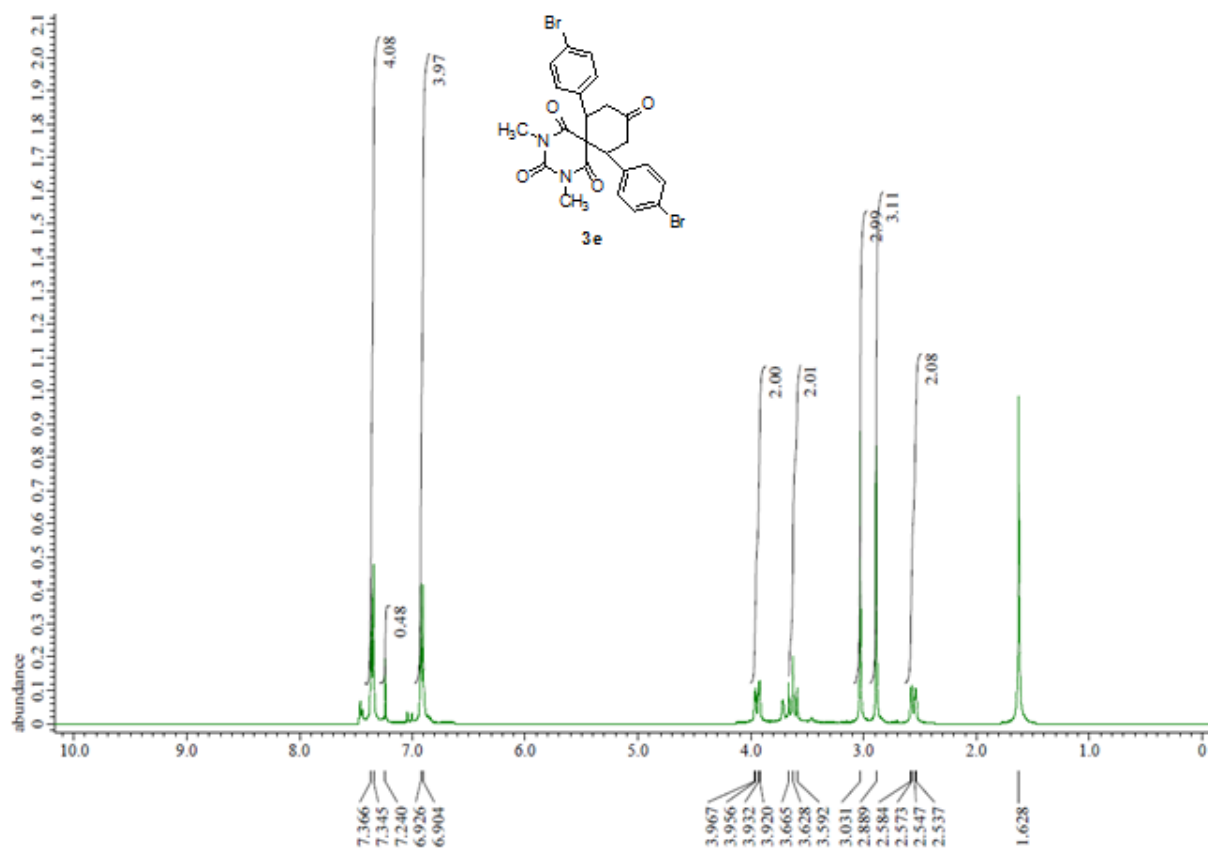

X : parts per Million : 1H

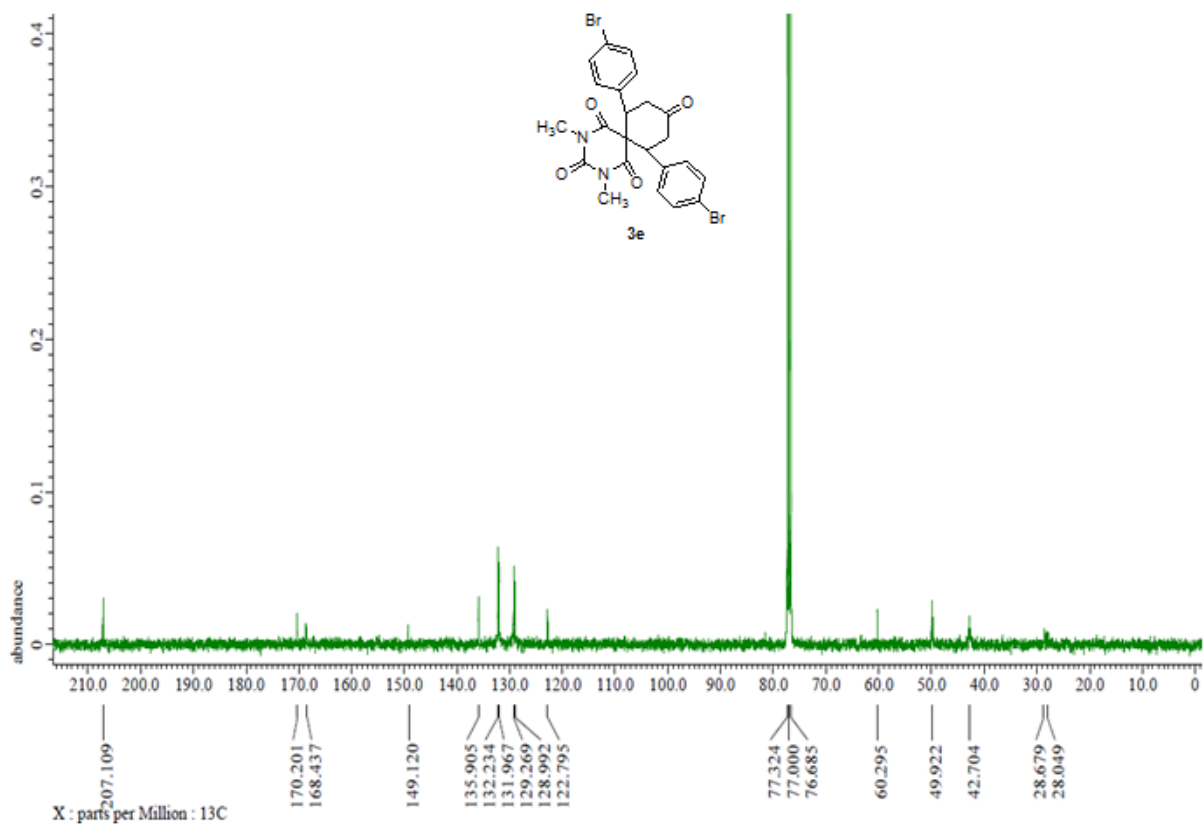

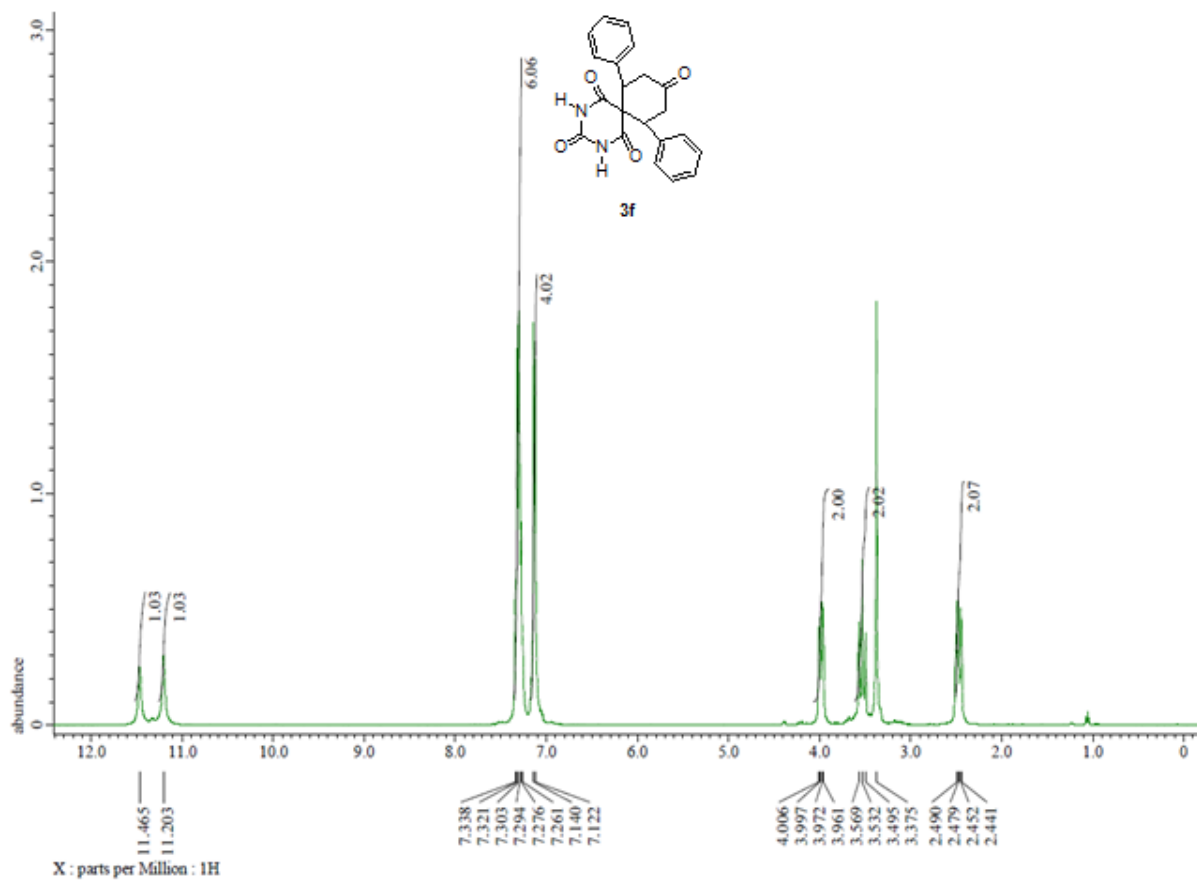



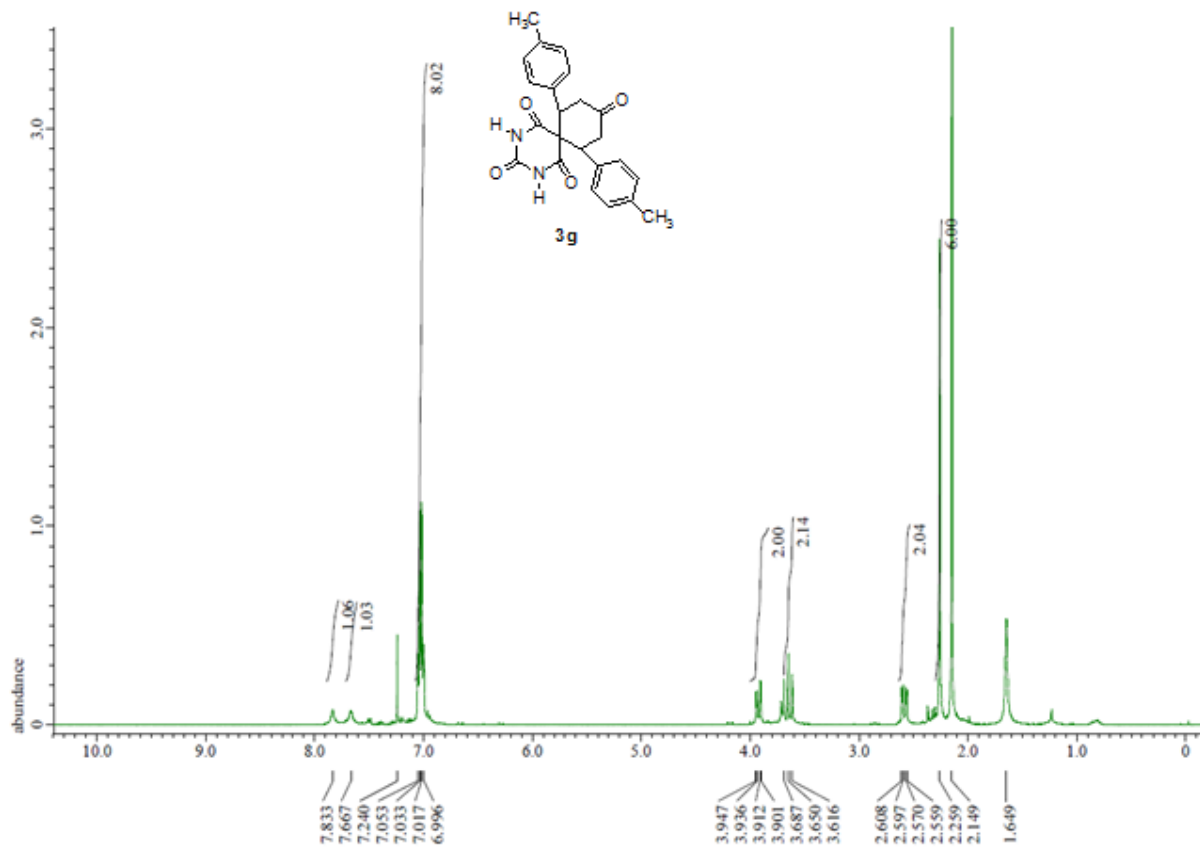

X : parts per Million : 1H

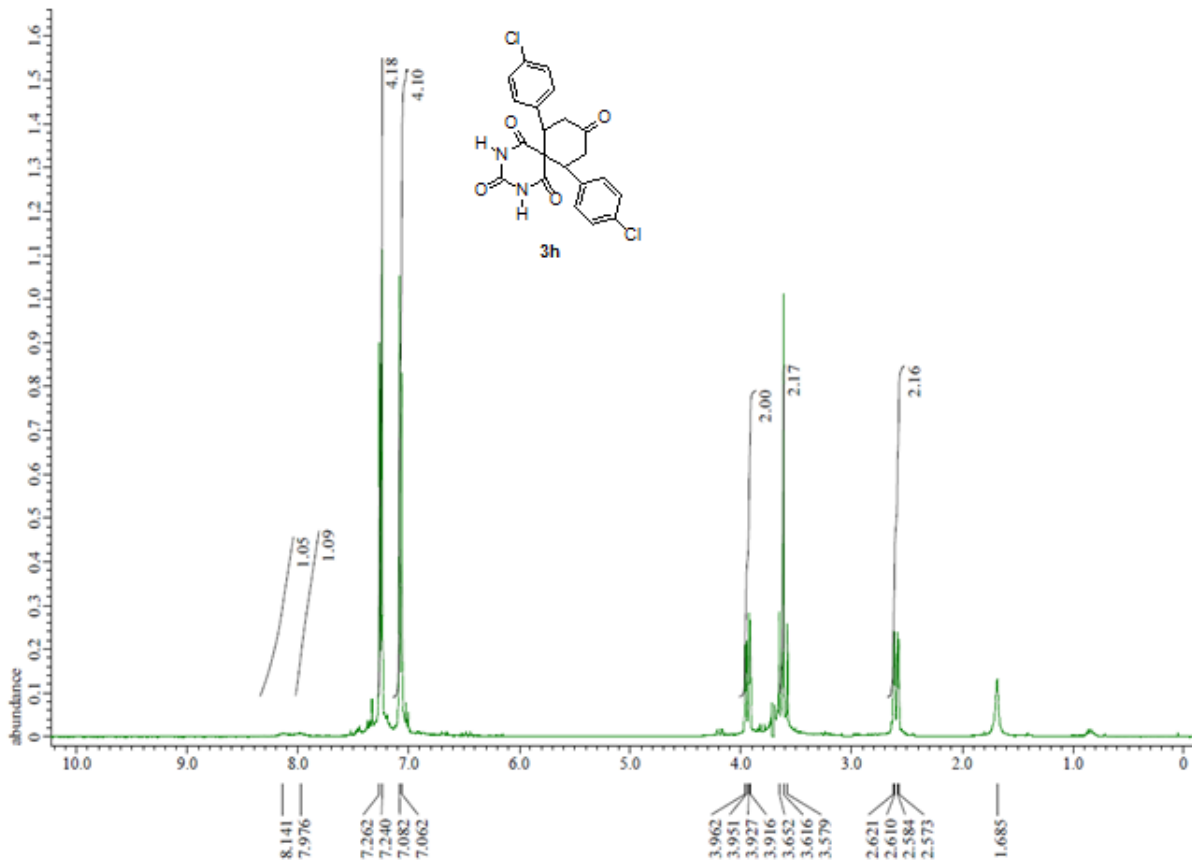

X : parts per Million : 1H

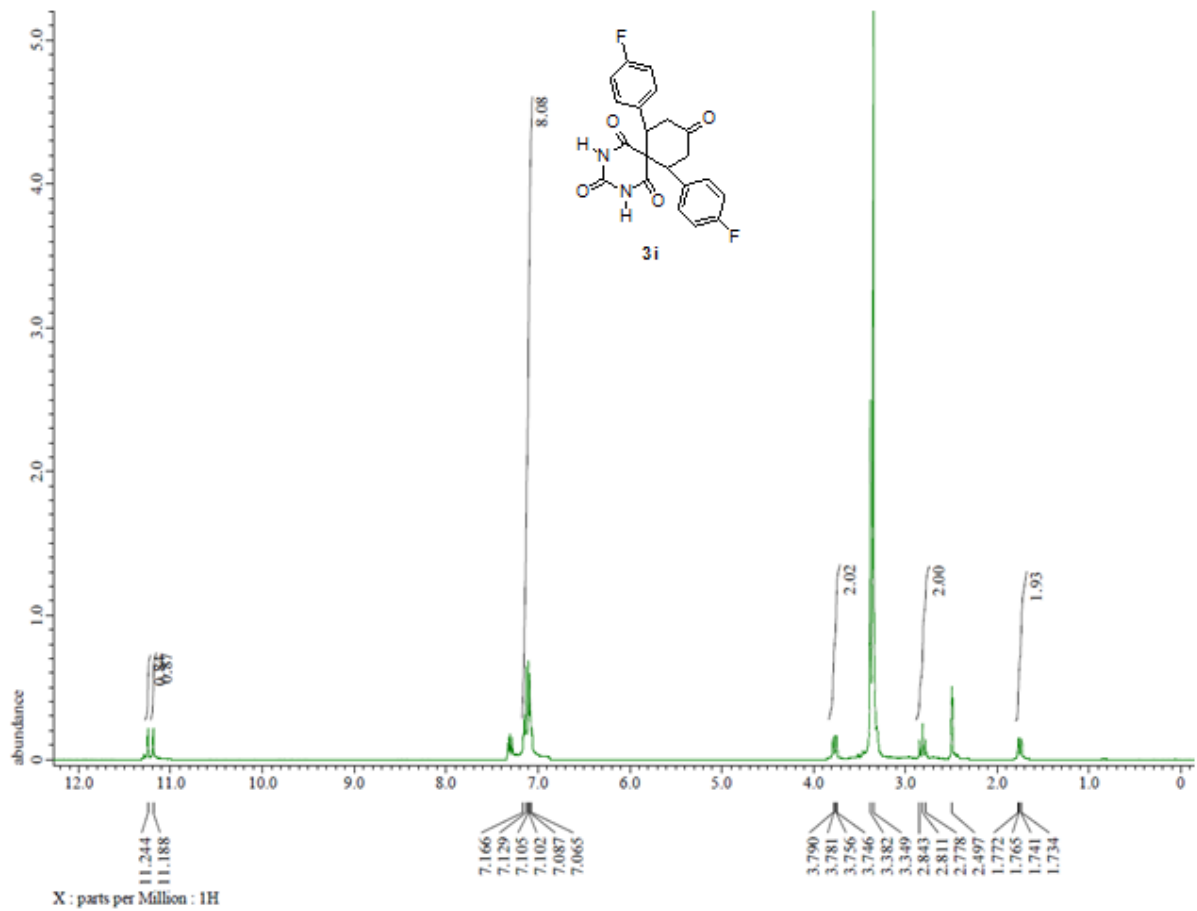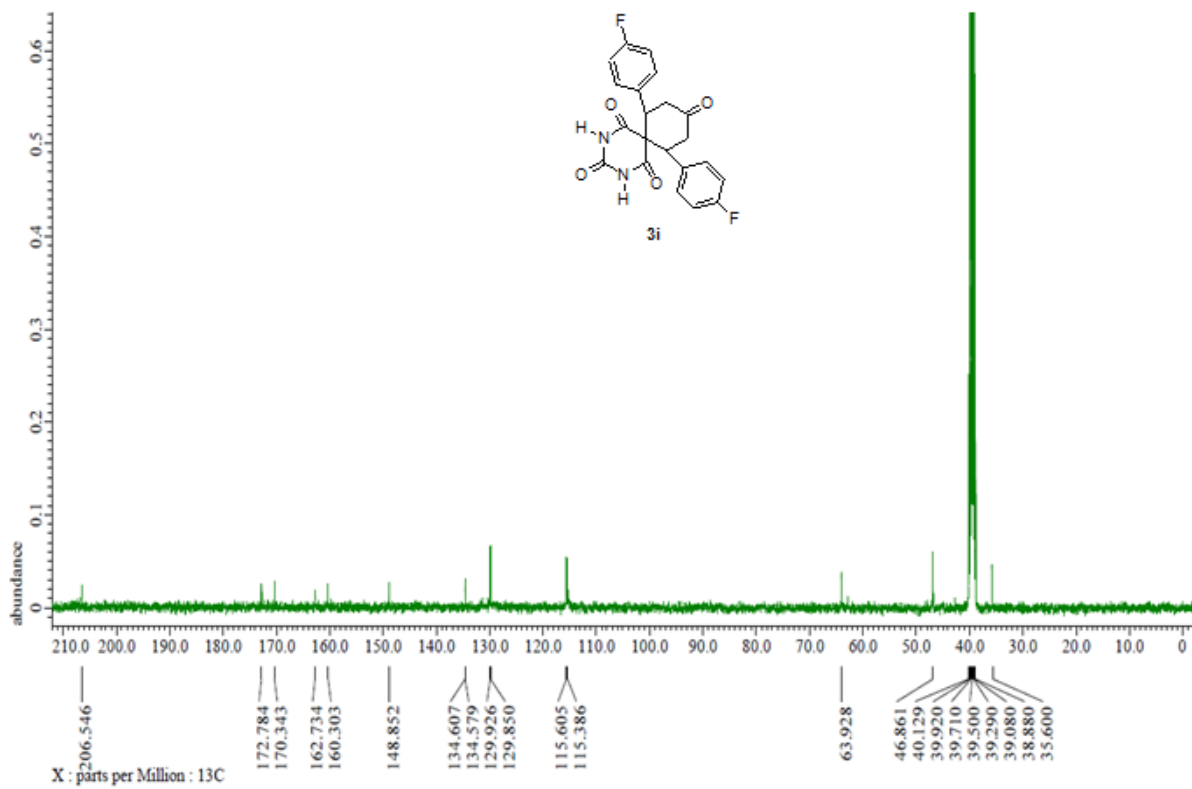

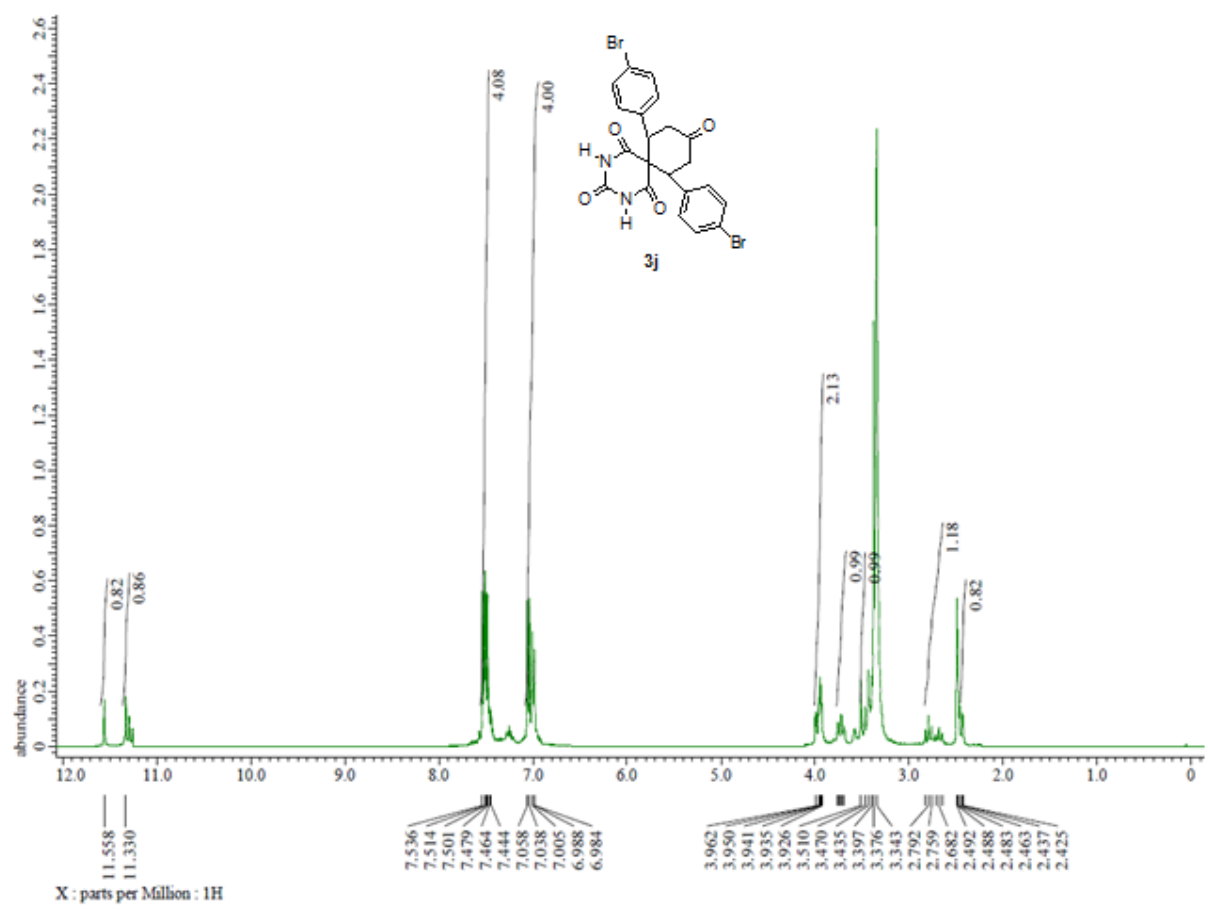





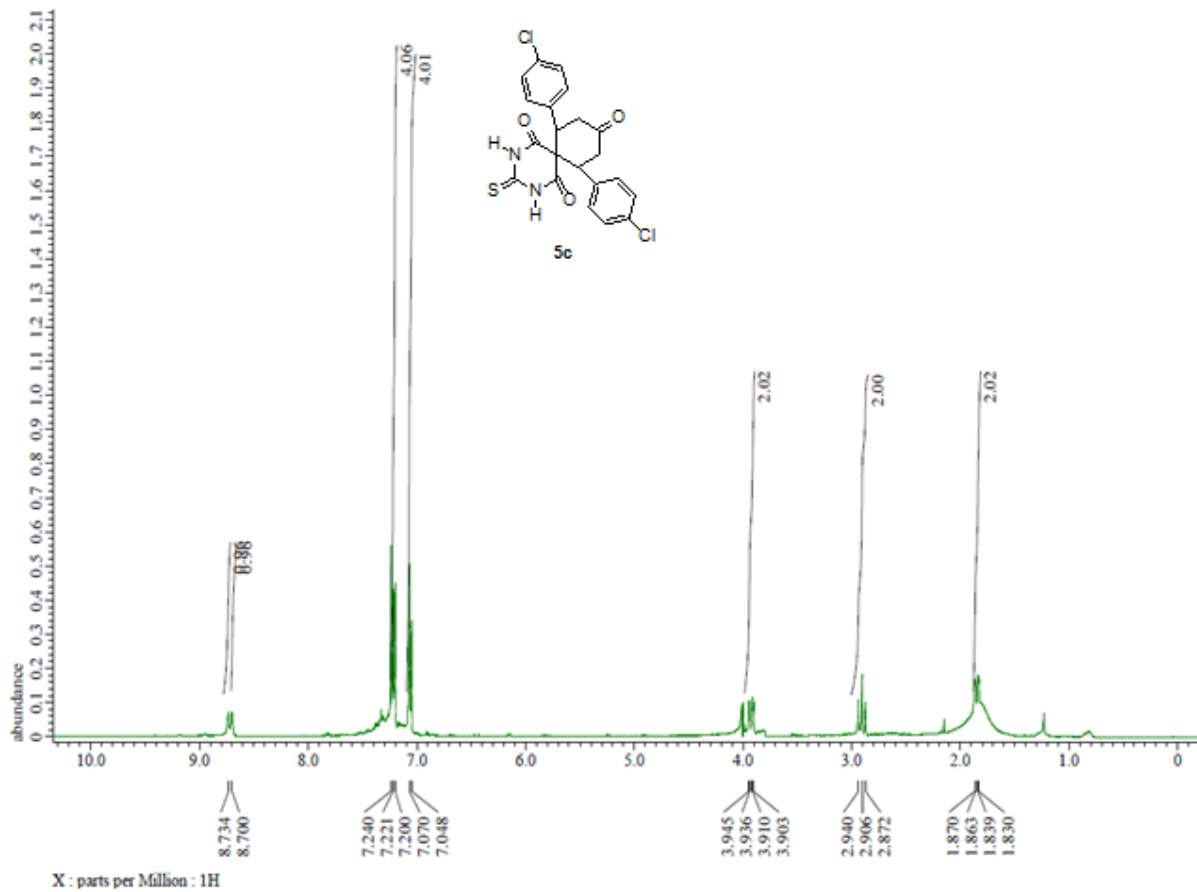

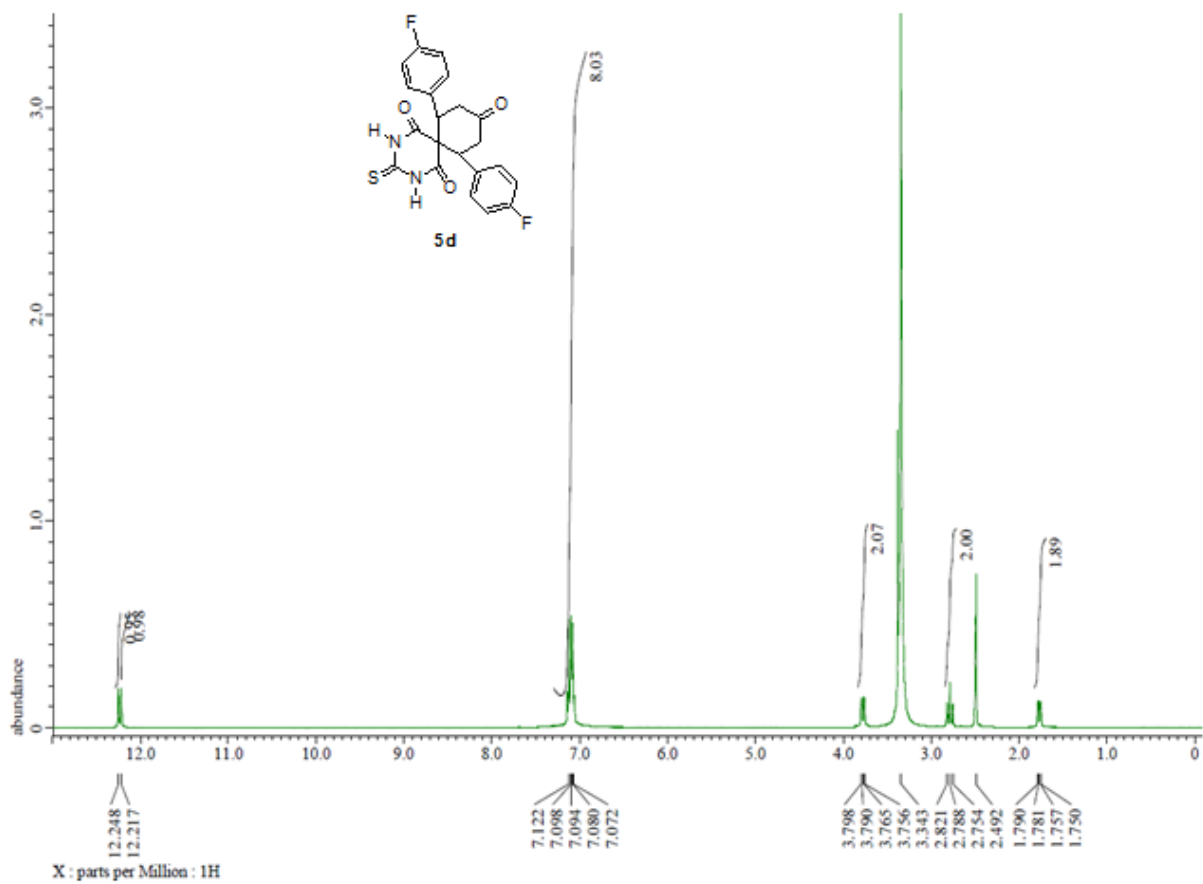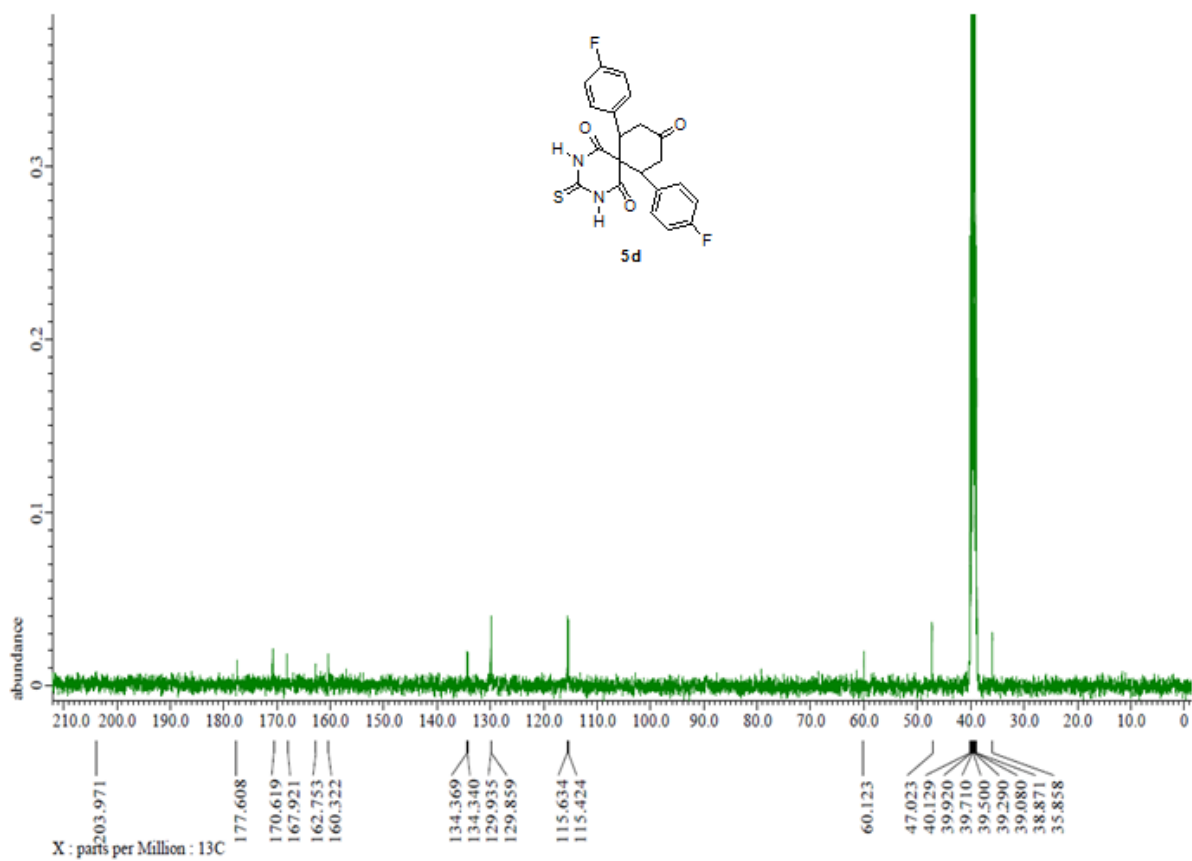



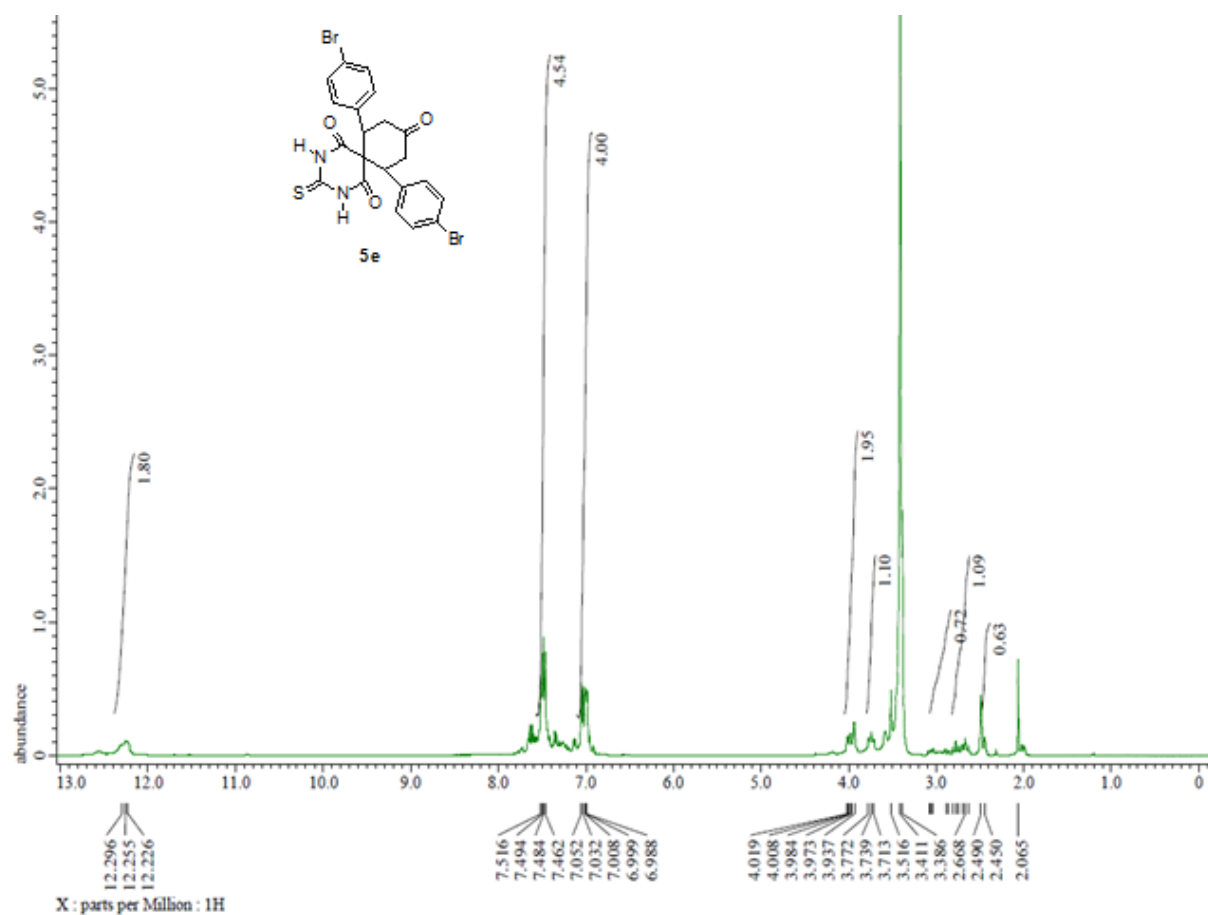

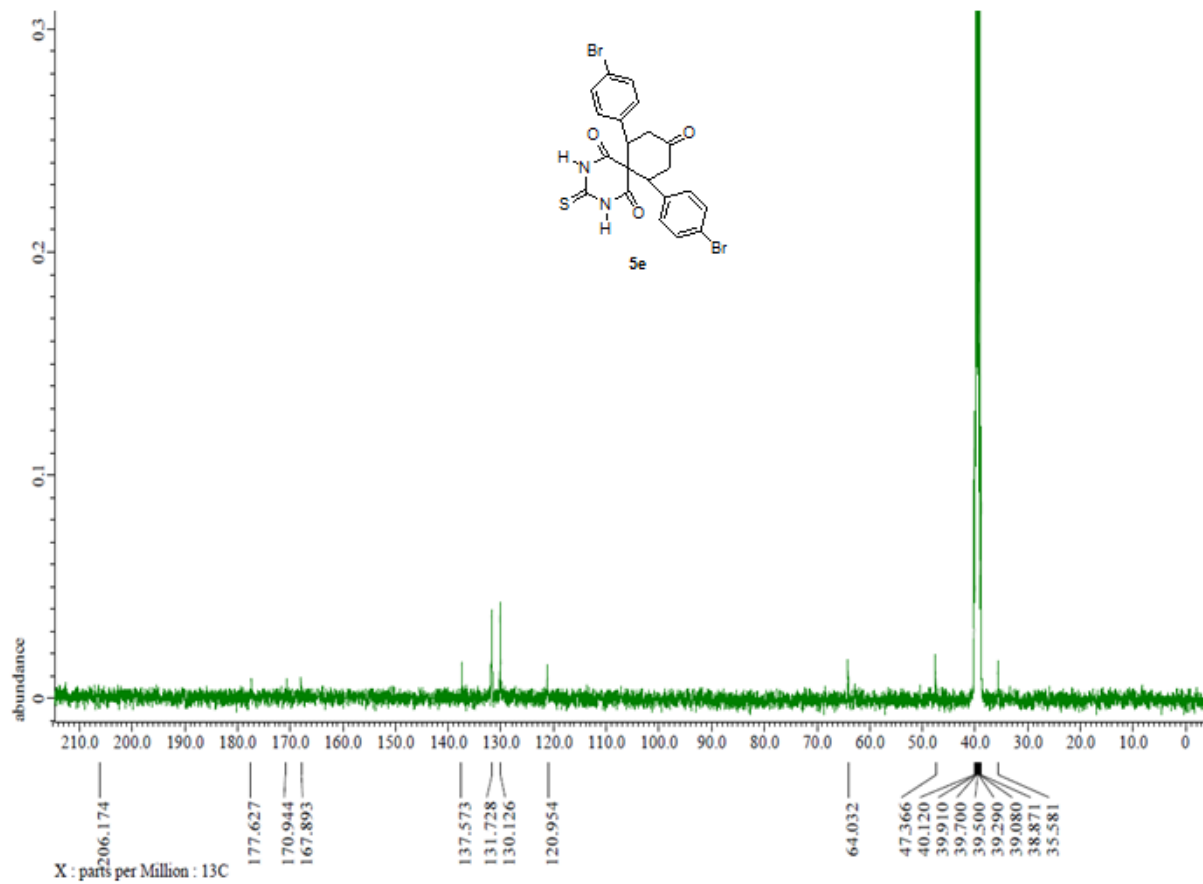

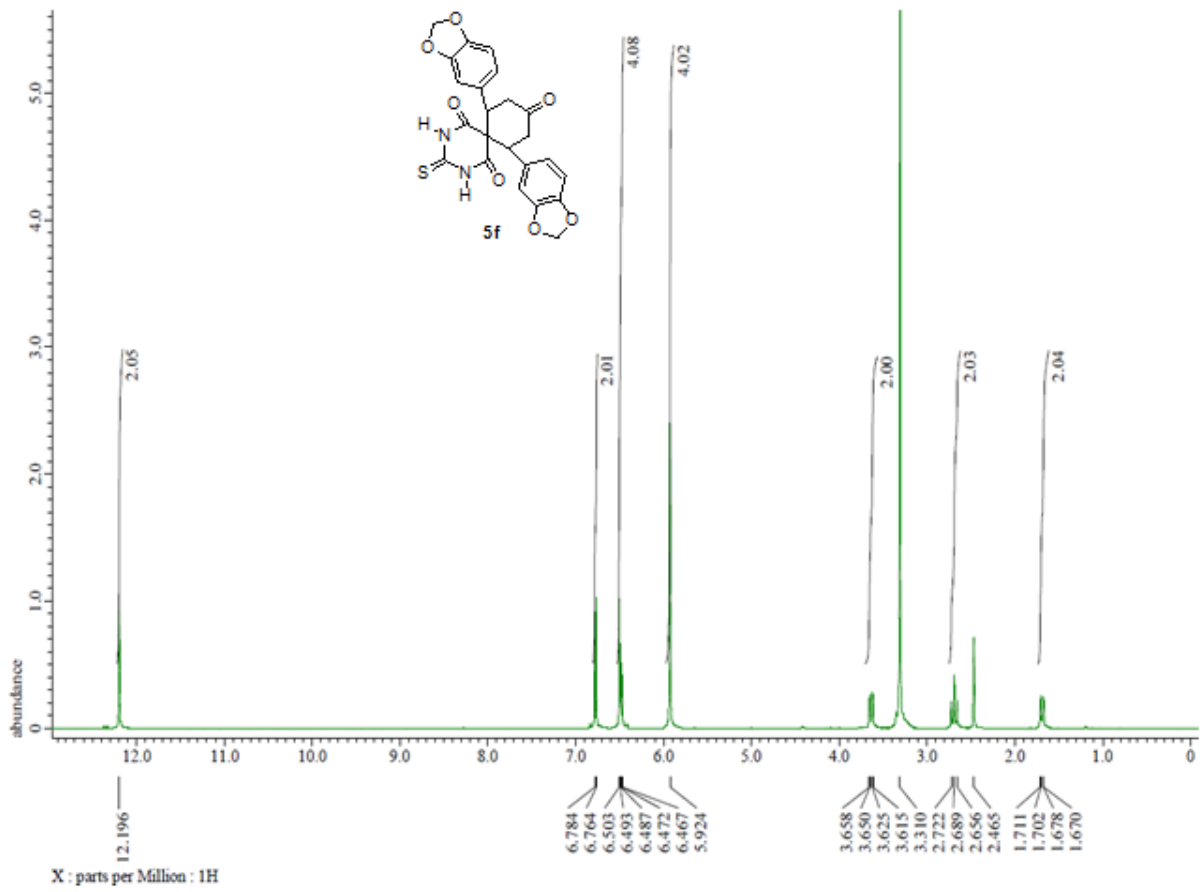

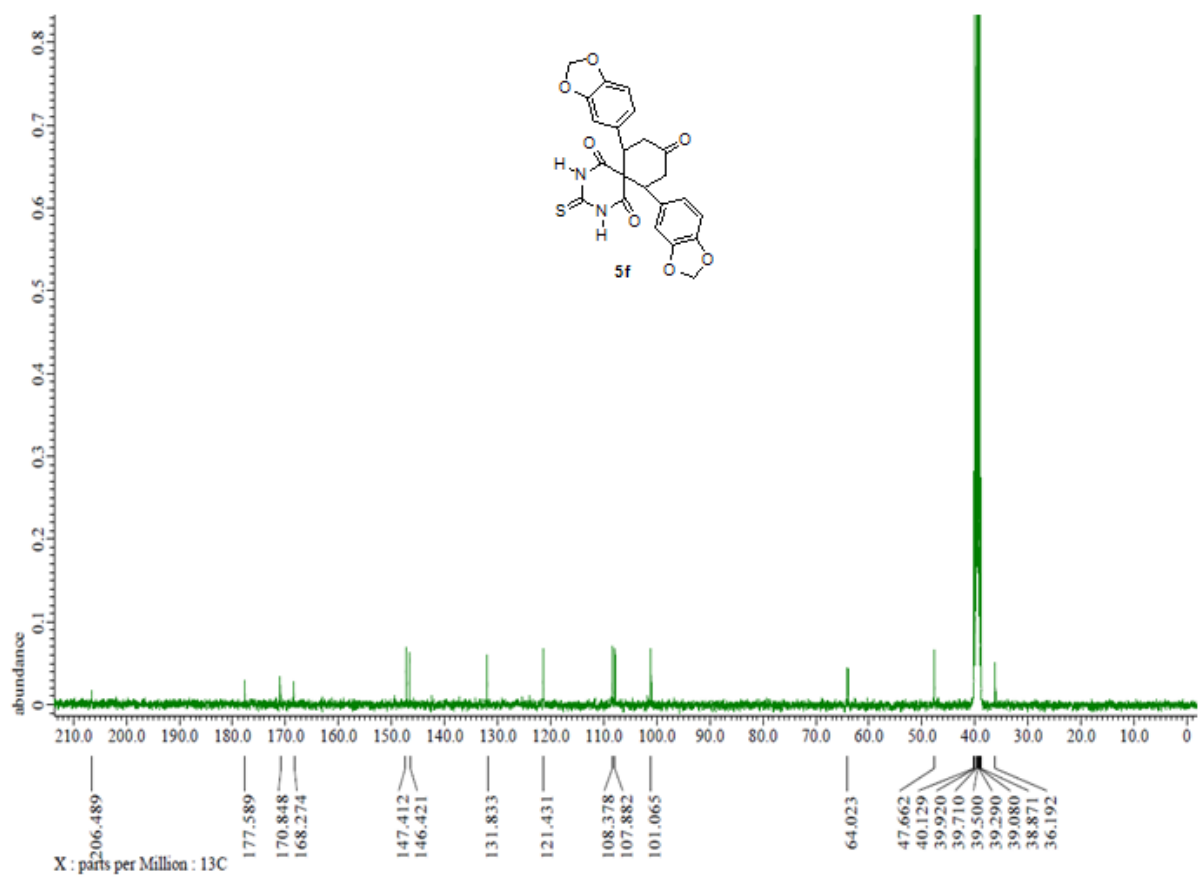

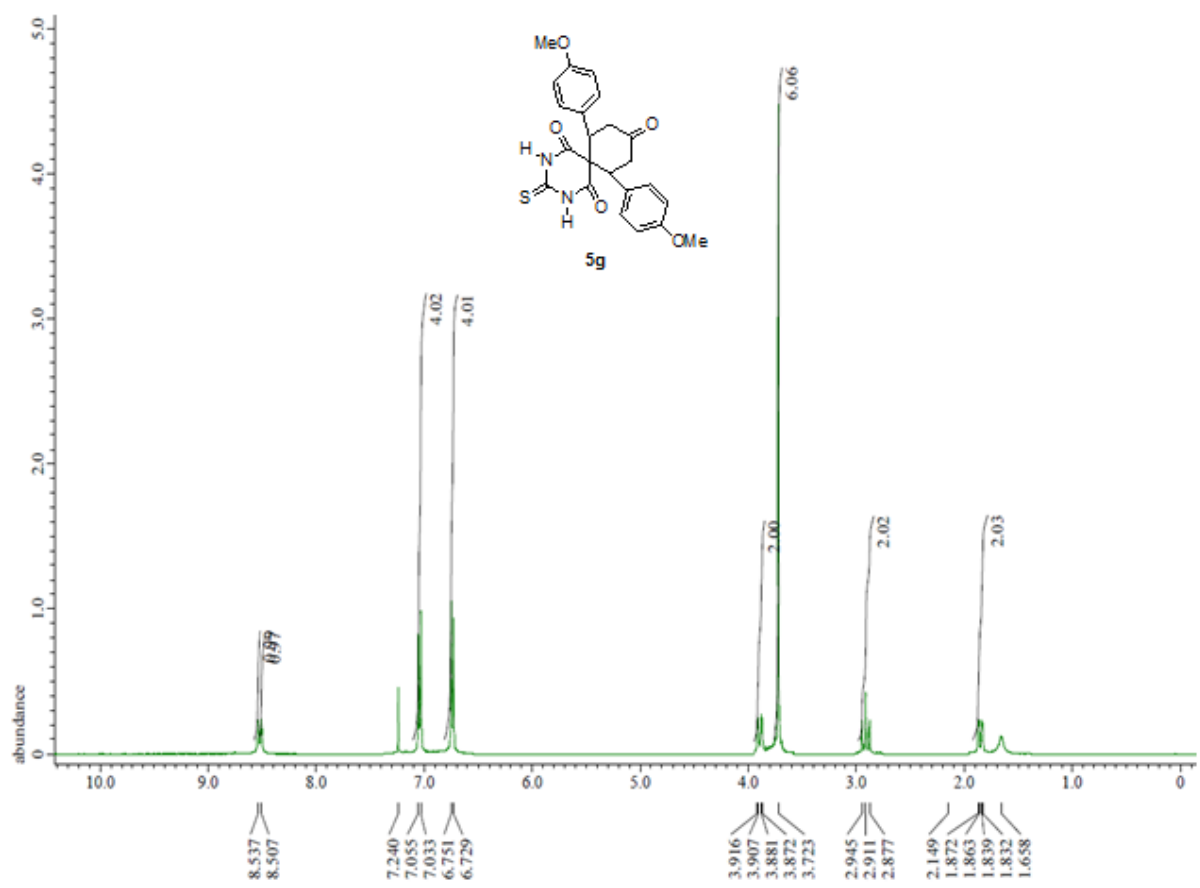

X : parts per Million : 1H

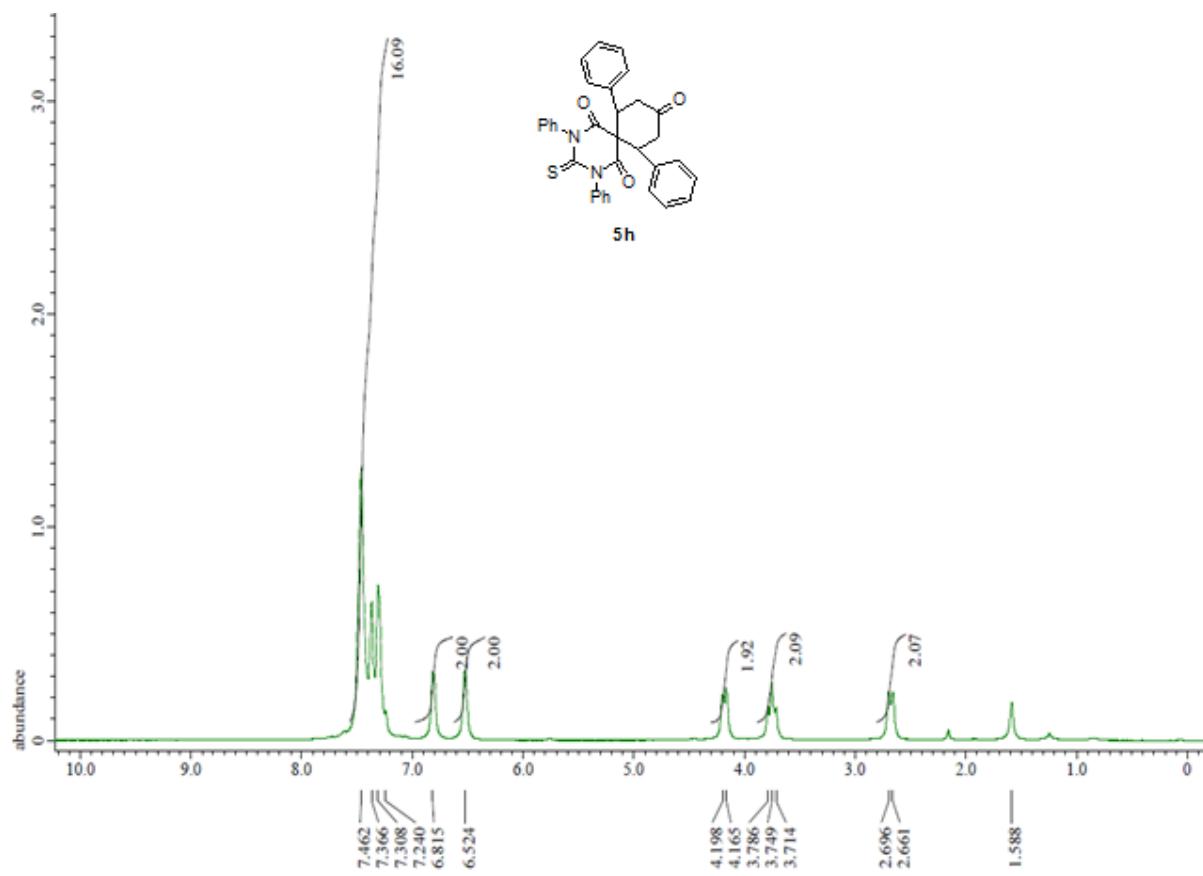

X : parts per Million : 1H

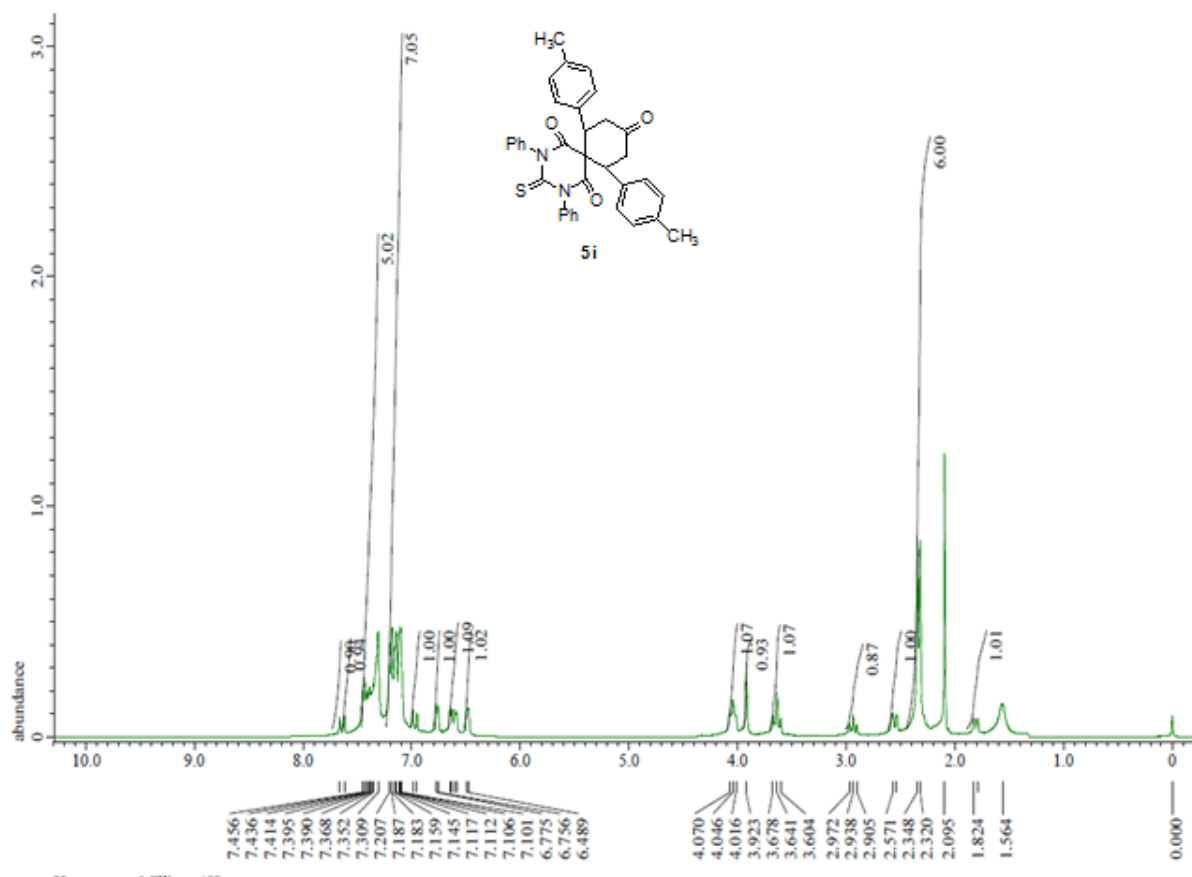

X : parts per Million : 1H

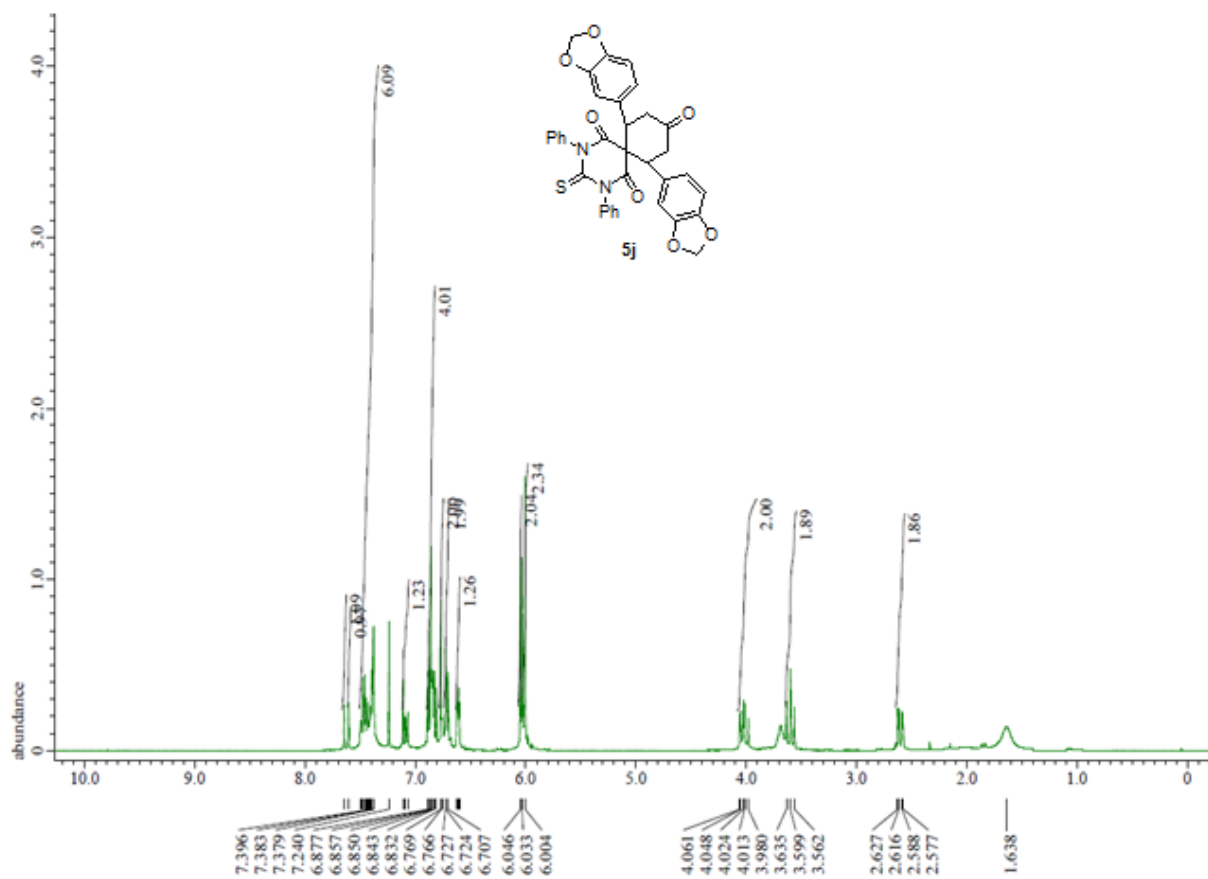

X : parts per Million : 1H



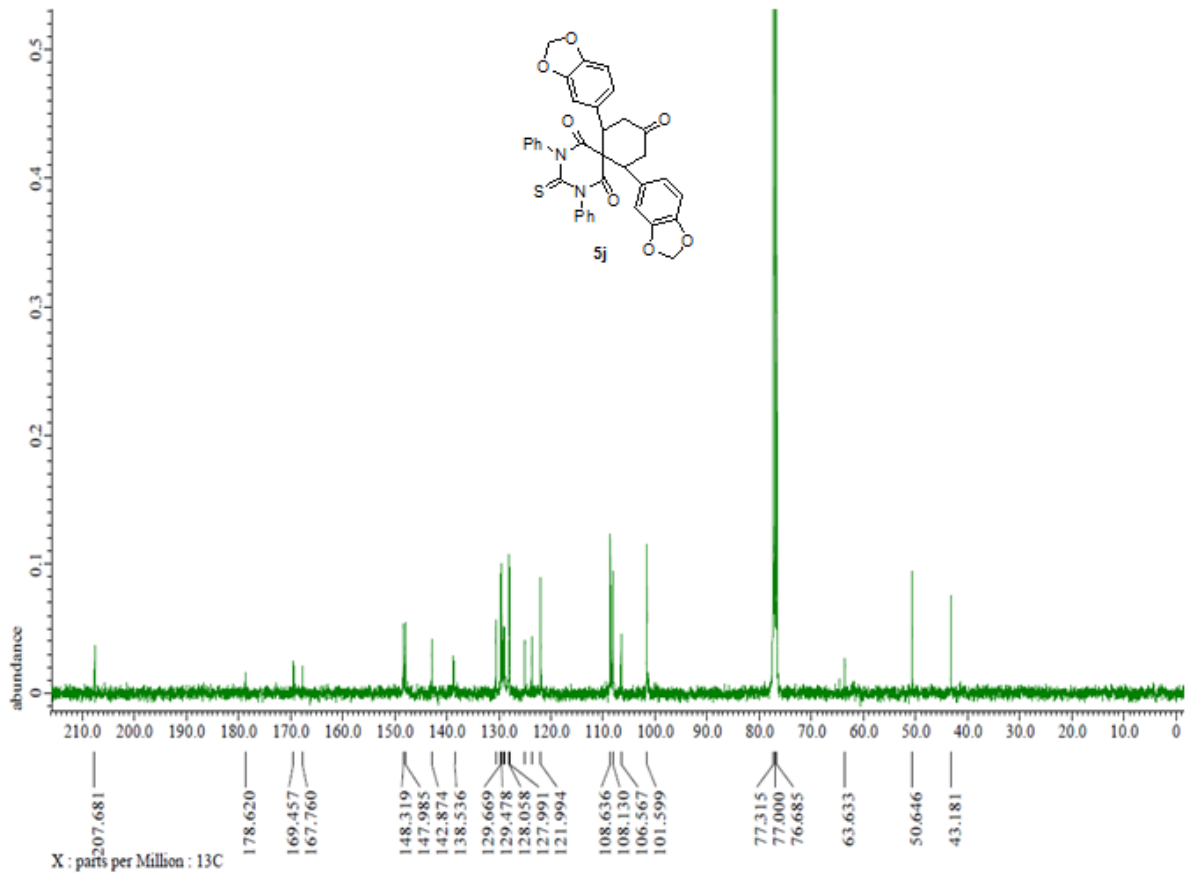

Supplement: c4ra00521j1.pdf [file c4ra00521j1.pdf]
